# Supplementary material for: Intoxicacions, al·lèrgies i irritacions
Source: PLOS journal article supplement (doi:10.1371/journal.pcbi.1009030), 1986-01-01
Supplement: S1 (10.1371/journal.pcbi.1009030.s001) [file journal.pcbi.1009030.s001]

**Table S1.** Model parameters describing the gene drive construct, mosquito bionomics and malaria epidemiology for simulations resembling releases on Grand Comore, Union of the Comoros.

| Parameter:                                                                                  | Symbol:        | Value:         | Reference:              |
|---------------------------------------------------------------------------------------------|----------------|----------------|-------------------------|
| <b>Gene drive construct:</b>                                                                |                |                |                         |
| Cleavage rate in females                                                                    | $c_{H,F}$      | 0.788          | [1]                     |
| Cleavage rate in males                                                                      | $c_{H,M}$      | 0.480          | [1]                     |
| Proportion of cleaved alleles subject to accurate homology-directed repair (HDR) in females | $p_{HDR,F}$    | 0.798          | [1]                     |
| Proportion of cleaved alleles subject to accurate HDR in males                              | $p_{HDR,M}$    | 0.769          | [1]                     |
| Proportion of resistance alleles that are in-frame, functional                              | $p_{RES}$      | 0.167          | [1]                     |
| Reduction in adult lifespan for gRNA/refractory allele homozygotes                          | $SHB$          | 0.1            | [1]                     |
| Reduction in female fecundity per Cas9 allele                                               | $SC,F$         | 0.078          | [1]                     |
| <b>Mosquito bionomics:</b>                                                                  |                |                |                         |
| Egg production per adult female ( $\text{day}^{-1}$ )                                       | $\beta$        | 32             | [2]                     |
| Mean duration of egg stage (days)                                                           | $T_E$          | 3              | [3]                     |
| Mean duration of larval stage (days)                                                        | $T_L$          | 7              | [3]                     |
| Mean duration of pupa stage (days)                                                          | $T_P$          | 2              | [3]                     |
| Coefficient of variation (duration of egg stage)                                            | $CV(T_E)$      | 0.2            | [4]                     |
| Coefficient of variation (duration of larval stage)                                         | $CV(T_L)$      | 0.3            | [4]                     |
| Coefficient of variation (duration of pupa stage)                                           | $CV(T_P)$      | 0.2            | [4]                     |
| Carrying capacity of environment (larvae)                                                   | $K$            | (time-varying) | Data: ERA5, Method: [5] |
| Mortality rate of adult mosquitoes ( $\text{day}^{-1}$ )                                    | $\mu_F, \mu_M$ | (time-varying) | Data: ERA5, Method: [6] |

| <b>Malaria transmission:</b>                            |                      |         |      |
|---------------------------------------------------------|----------------------|---------|------|
| Blood feeding rate                                      | $f$                  | 1/3     | [7]  |
| Human blood index                                       | $Q$                  | 0.9     | [7]  |
| Transmission efficiency: infected mosquito to human     | $b$                  | 0.55    | [7]  |
| Transmission efficiency: infected human to mosquito     | $c$                  | 0.15    | [7]  |
| Mean duration of extrinsic incubation period (days)     | EIP ( $1/\gamma_V$ ) | 10      | [8]  |
| Coefficient of variation of extrinsic incubation period | CV(EIP)              | 0.4     | [9]  |
| Human infectious period (days)                          | $1/r$                | 200     | [7]  |
| Human lifespan (years)                                  | $1/\mu_H$            | 62      | [10] |
| Human population size                                   | $N_H$                | 350,998 | [10] |

## References:

1. Li, M. *et al.* (2020) 'Development of a confinable gene drive system in the human disease vector *Aedes aegypti*', *eLife*, 9(2020): e51701.
2. Depinay, J.-M. O. *et al.* (2004) 'A simulation model of African *Anopheles* ecology and population dynamics for the analysis of malaria transmission', *Malaria journal*, 3, p. 29.
3. Yaro, A. S. *et al.* (2006) 'The distribution of hatching time in *Anopheles gambiae*', *Malaria journal*, 5, p. 19.
4. Bayoh, M. N. and Lindsay, S. W. (2003) 'Effect of temperature on the development of the aquatic stages of *Anopheles gambiae sensu stricto* (Diptera: Culicidae)', *Bulletin of entomological research*, 93(5), pp. 375–381.
5. White, M. T. *et al.* (2011) 'Modelling the impact of vector control interventions on *Anopheles gambiae* population dynamics', *Parasites & vectors*, 4, p. 153.
6. Mordecai, E. A. *et al.* (2019) 'Thermal biology of mosquito-borne disease', *Ecology letters*, 22(10), pp. 1690–1708.
7. Smith, D. L. and McKenzie, F. E. (2004) 'Statics and dynamics of malaria infection in *Anopheles* mosquitoes', *Malaria journal*, 3, p. 13.
8. Smith, D. L., Dushoff, J. and Ellis McKenzie, F. (2004) 'The Risk of a Mosquito-Borne Infection in a Heterogeneous Environment', *PLoS Biology*, p. e368. doi: 10.1371/journal.pbio.0020368.
9. Huber, J. H. *et al.* (2016) 'Quantitative, model-based estimates of variability in the generation and serial intervals of *Plasmodium falciparum* malaria', *Malaria journal*, 15(1), p. 490.
10. INSEED (2015) *Annuaire Statistique des Comores. Moroni, Union of the Comoros*. National Institute of Statistics and Economic and Demographic Studies (INSEED).
